# Supplementary material
Source: Springer Nature journal article supplement (https://www.springermedizin.de/resource/supplementary/12891_2009_654_MOESM3_ESM.pdf/9506482)

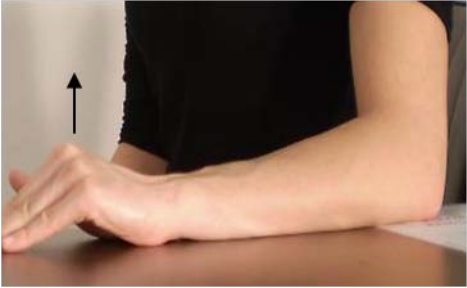

Supplement: MOESM3 [file 9506482]
